# Supplementary material
Source: Springer Nature journal article supplement (https://www.springermedizin.de/resource/supplementary/13041_2013_215_MOESM3_ESM.pdf/25657760)

**A**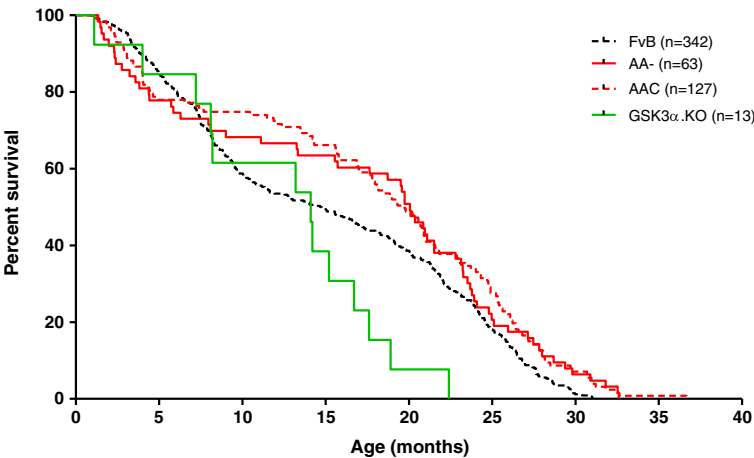**B**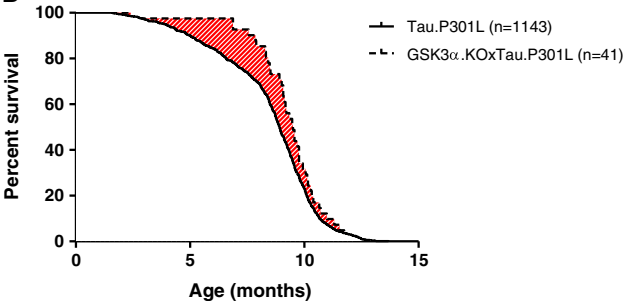

Supplement: MOESM3 [file 25657760]
